# Supplementary material
Source: publisher site journal article supplement (https://www.spandidos-publications.com/7647/downloadSupplementary)

Figure S1. Sensitivity analysis based on (A) objective response rate, (B) median progression-free survival, (C) median overall survival, (D) AEs, (E) AEs grade  $\geq 3$ . AEs, adverse events.

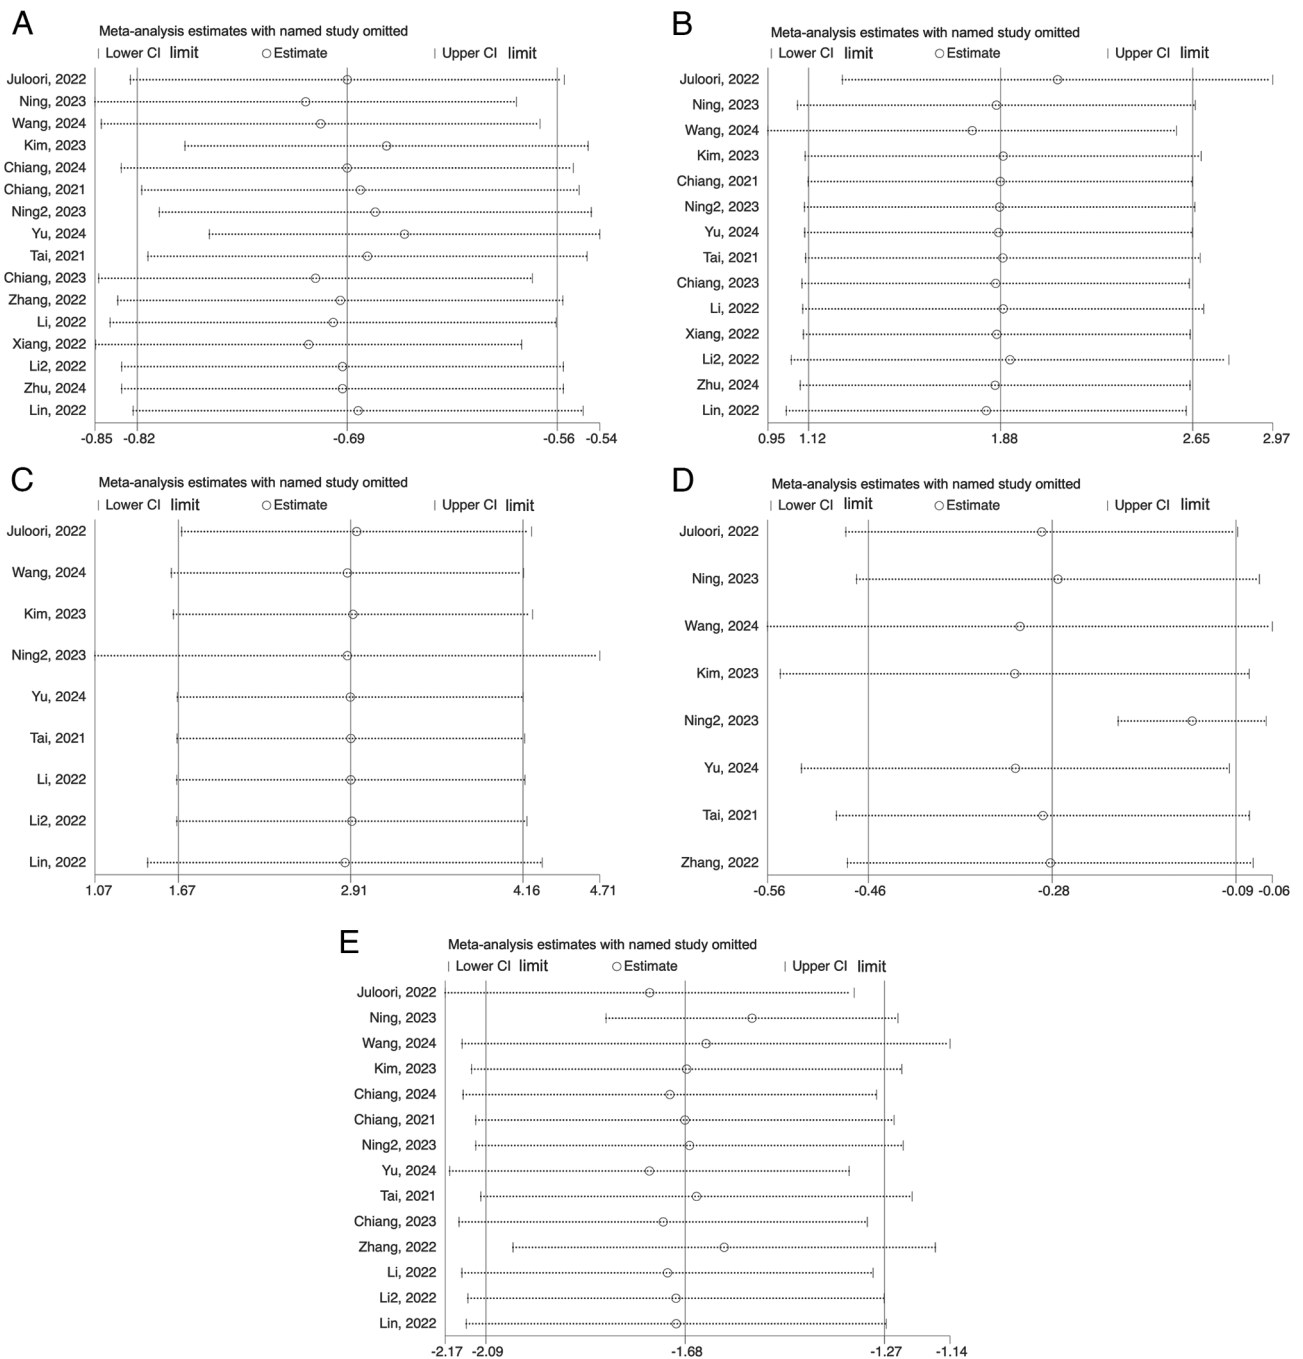

Supplement: Supplementary file 1 [file downloadSupplementary]
